# Supplementary material for: Age Differences in Estimating Physical Activity by Wrist Accelerometry Using Machine Learning
Source: MDPI journal article supplement (doi:10.3390/s21103352), 2021-05-12
Supplement: s1 [file s1]

**Table S1.** List of the performed physical activities, their type, and intensity.

| Activity                          | Activity Type |            |            | Intensity |       |          |
|-----------------------------------|---------------|------------|------------|-----------|-------|----------|
|                                   | Sedentary     | Locomotion | Life-Style | Low       | Light | Moderate |
| leisure walk                      | No            | Yes        | No         | No        | No    | Yes      |
| rapid walk                        | No            | Yes        | No         | No        | No    | Yes      |
| light gardening                   | No            | No         | Yes        | No        | No    | Yes      |
| yard work                         | No            | No         | Yes        | No        | No    | Yes      |
| prepare serve meal                | No            | No         | Yes        | No        | Yes   | No       |
| digging                           | No            | No         | Yes        | No        | No    | Yes      |
| straightening up dusting          | No            | No         | Yes        | No        | No    | Yes      |
| washing dishes                    | No            | No         | Yes        | No        | Yes   | No       |
| unloading storing dishes          | No            | No         | Yes        | No        | Yes   | No       |
| walking at rpe 1                  | No            | Yes        | No         | No        | No    | Yes      |
| personal care                     | No            | No         | Yes        | No        | Yes   | No       |
| dressing                          | No            | No         | Yes        | No        | Yes   | No       |
| walking at rpe 5                  | No            | Yes        | No         | No        | No    | Yes      |
| sweeping                          | No            | No         | Yes        | No        | No    | Yes      |
| vacuuming                         | No            | No         | Yes        | No        | No    | Yes      |
| stair descent                     | No            | Yes        | No         | No        | No    | Yes      |
| stair ascent                      | No            | Yes        | No         | No        | No    | Yes      |
| trash removal                     | No            | No         | Yes        | No        | No    | Yes      |
| replacing sheets on a bed         | No            | No         | Yes        | No        | No    | Yes      |
| stretching yoga *                 | No            | No         | No         | No        | Yes   | No       |
| mopping                           | No            | No         | Yes        | No        | No    | Yes      |
| light home maintenance            | No            | No         | Yes        | No        | No    | Yes      |
| computer work                     | Yes           | No         | No         | Yes       | No    | No       |
| heavy lifting                     | No            | No         | Yes        | No        | No    | Yes      |
| shopping                          | No            | No         | Yes        | No        | Yes   | No       |
| ironing                           | No            | No         | Yes        | No        | Yes   | No       |
| laundry washing                   | No            | No         | Yes        | No        | Yes   | No       |
| strength exercise leg curl *      | No            | No         | No         | No        | Yes   | No       |
| strength exercise chest press *   | No            | No         | No         | No        | Yes   | No       |
| strength exercise leg extension * | No            | No         | No         | No        | Yes   | No       |
| tv watching                       | Yes           | No         | No         | Yes       | No    | No       |
| standing still                    | Yes           | No         | No         | Yes       | No    | No       |
| washing windows                   | No            | No         | Yes        | No        | No    | Yes      |

A total of 29 activities were considered for PA type recognition, 33 for individual PA recognition, PA intensity recognition, and EE estimation. \* Only considered for energy expenditure estimation, PA intensity recognition, and individual PA recognition.

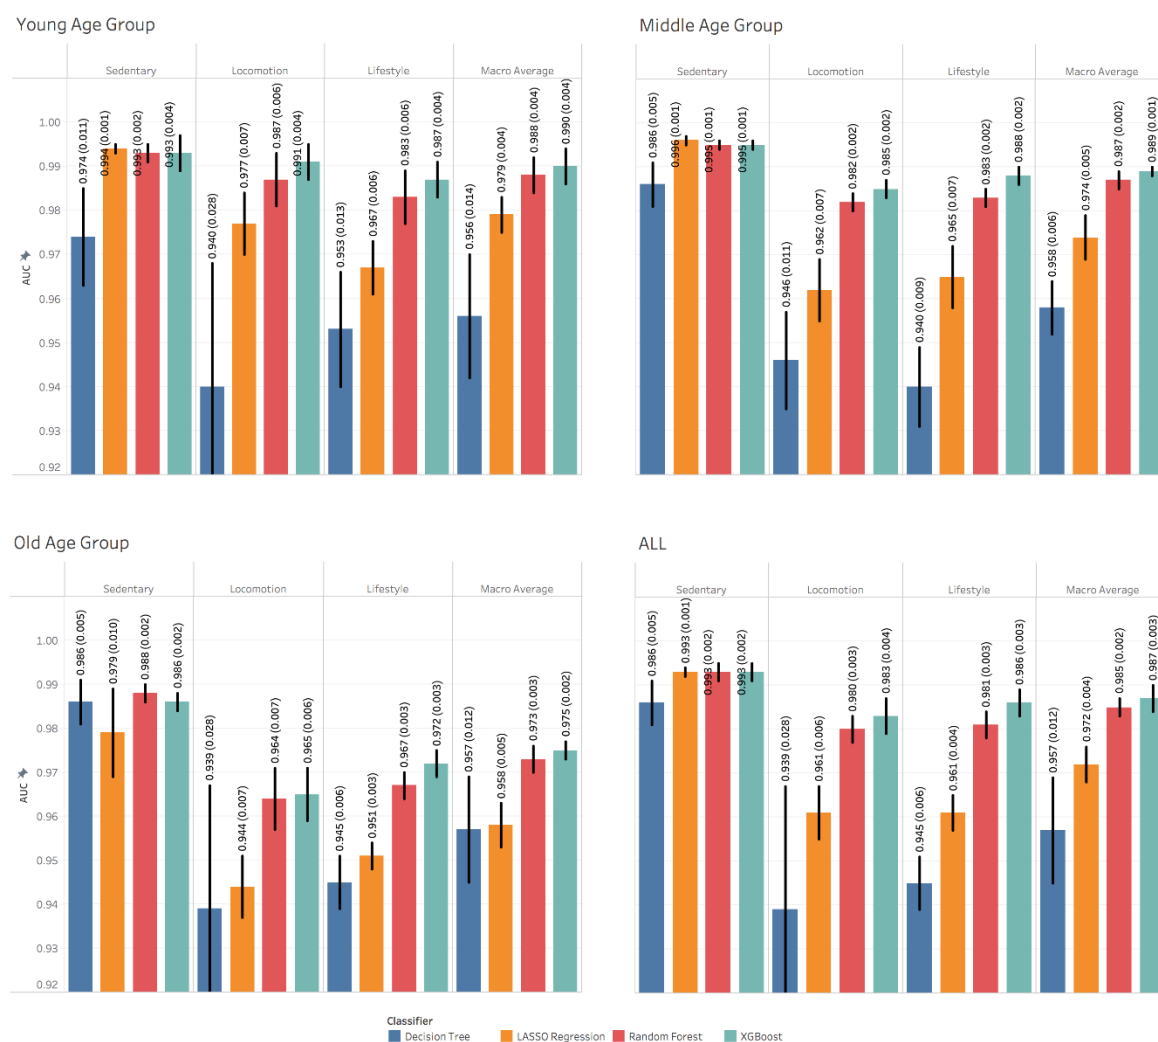

**Figure S1.** The receiver operating characteristic–area under the curve of recognizing physical activity type. Each value is the mean and standard deviation of the 5-fold nested cross validation.

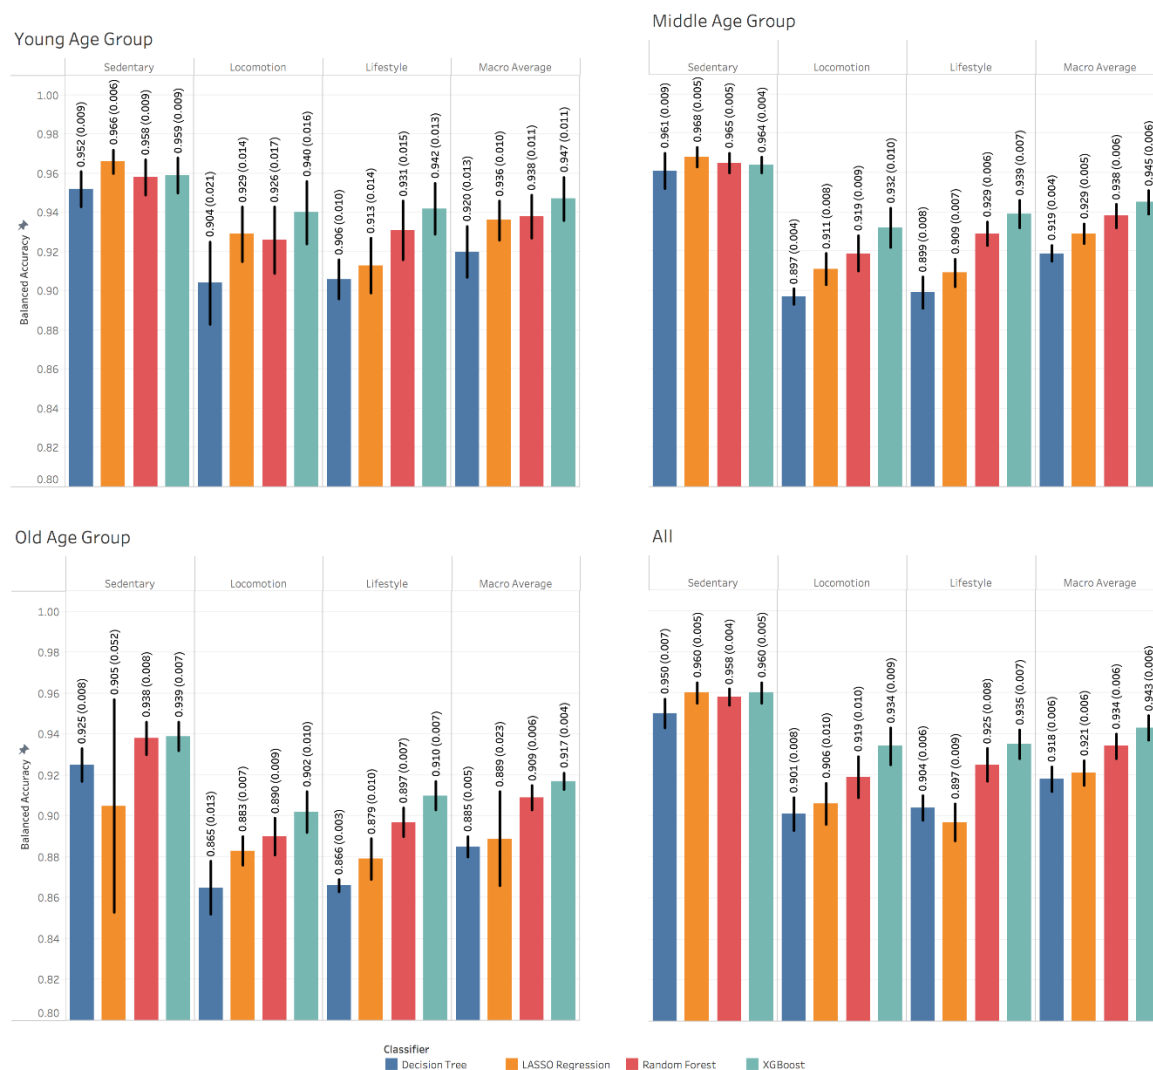

**Figure S2.** The balanced accuracy of recognizing physical activity type. Each value is the mean and standard deviation of the 5-fold nested cross validation.

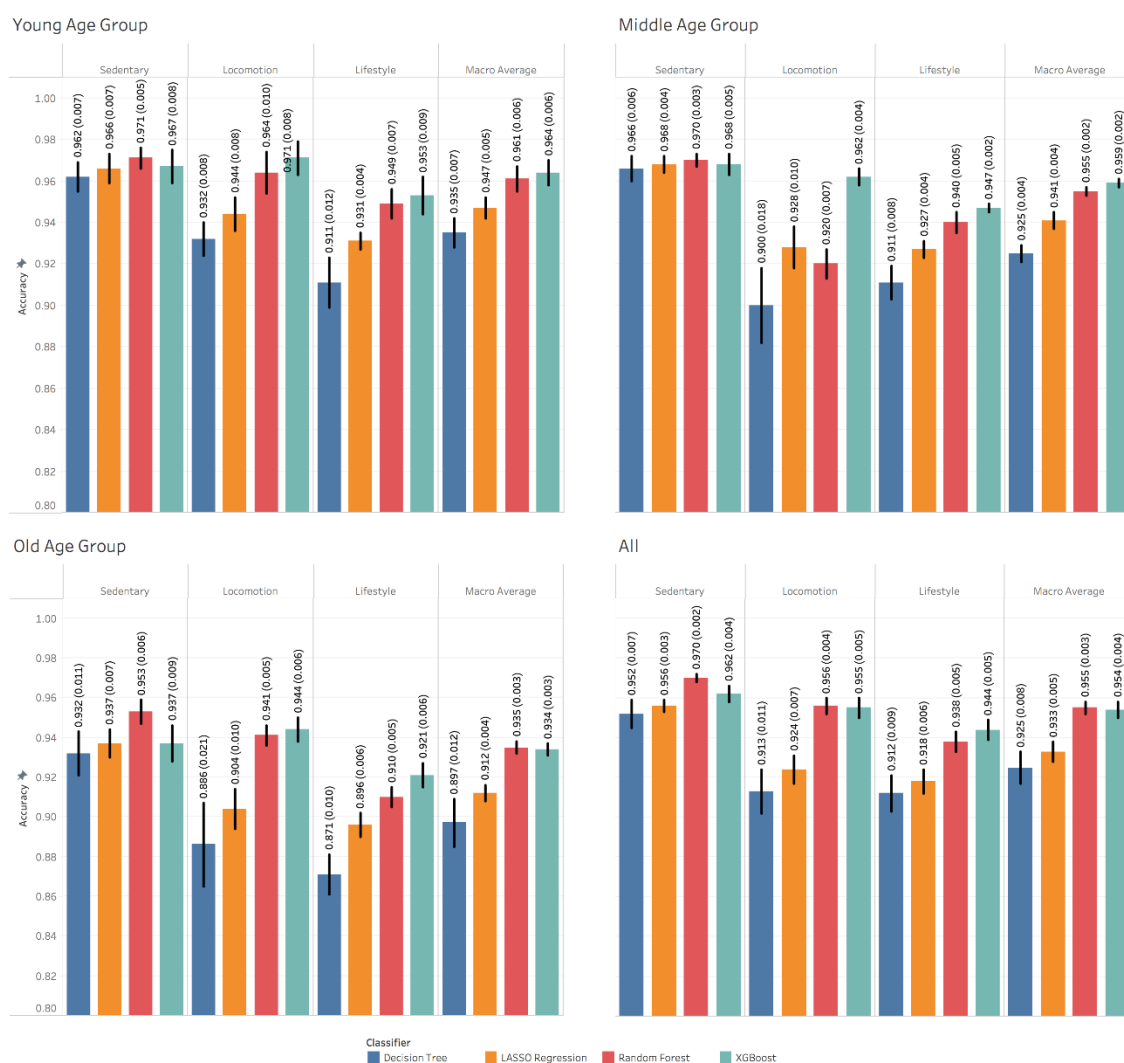

**Figure S3.** The accuracy of recognizing physical activity type. Each value is the mean and standard deviation of the 5-fold nested cross validation.

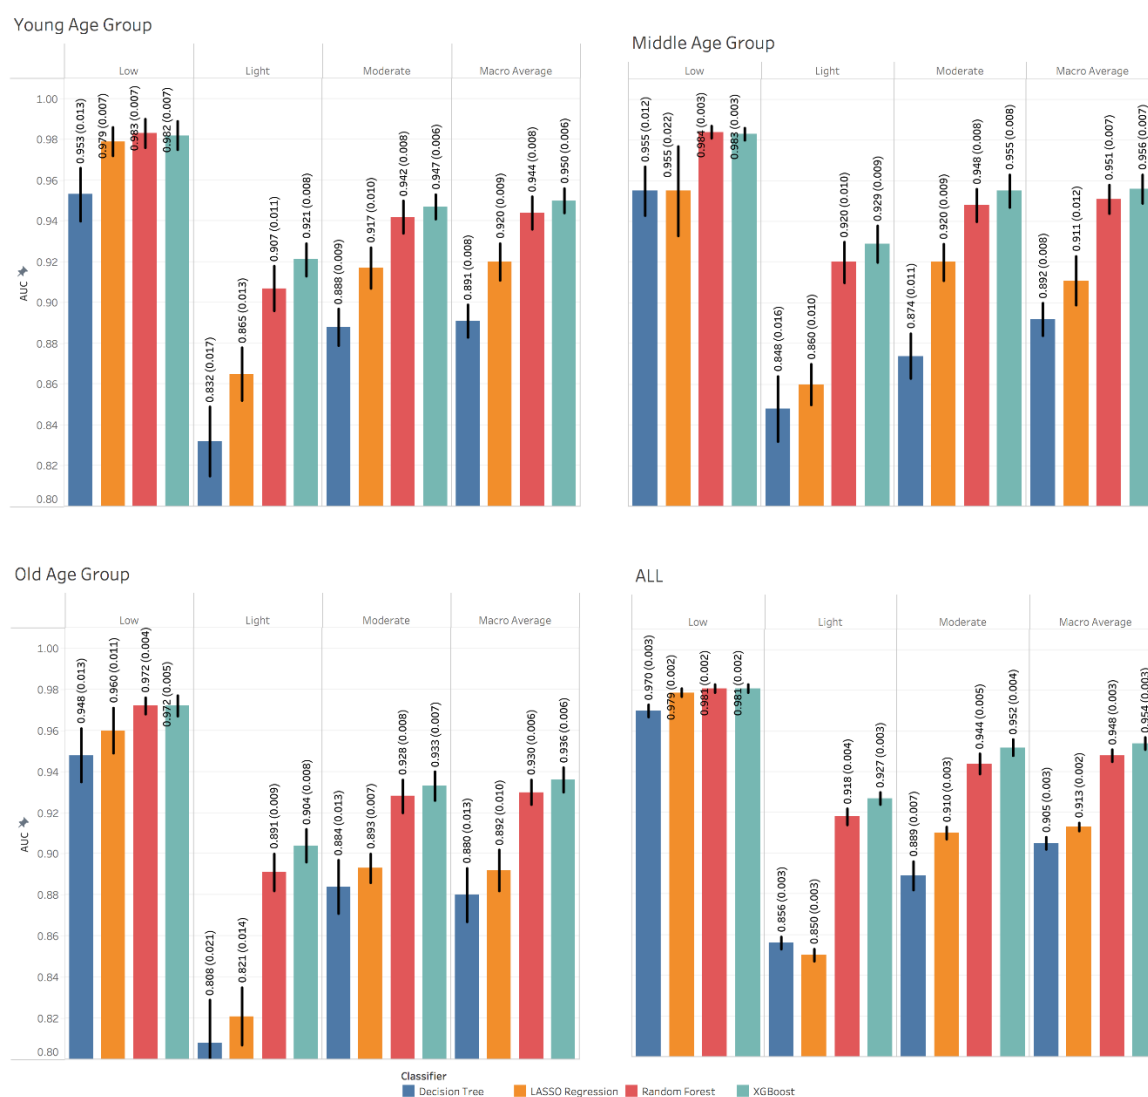

**Figure S4.** The receiver operating characteristic–area under the curve of recognizing physical activity intensity. Each value is the mean and standard deviation of the 5-fold nested cross validation.

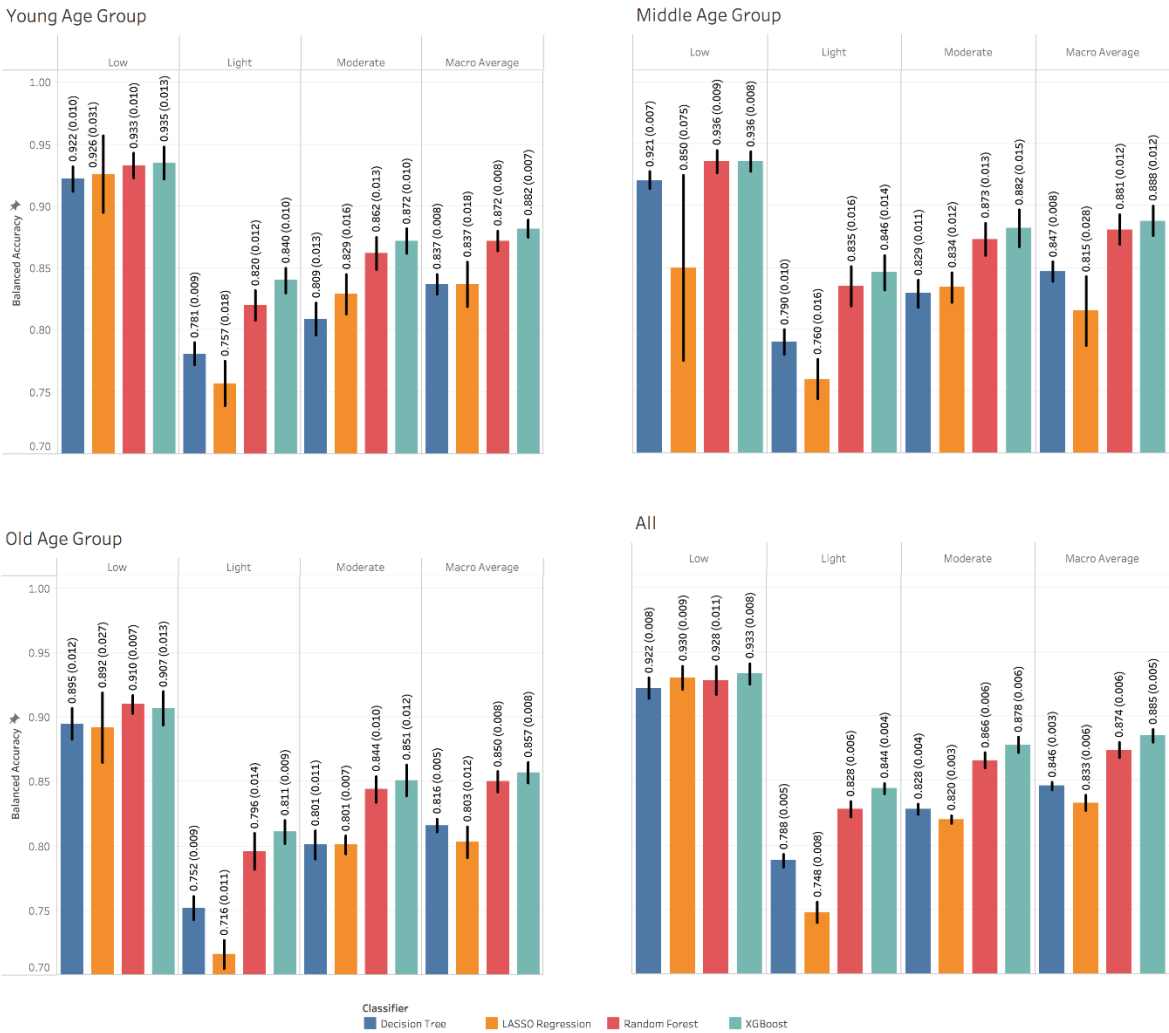

**Figure S5.** The balanced accuracy of recognizing physical activity intensity. Each value is the mean and standard deviation of the 5-fold nested cross validation.

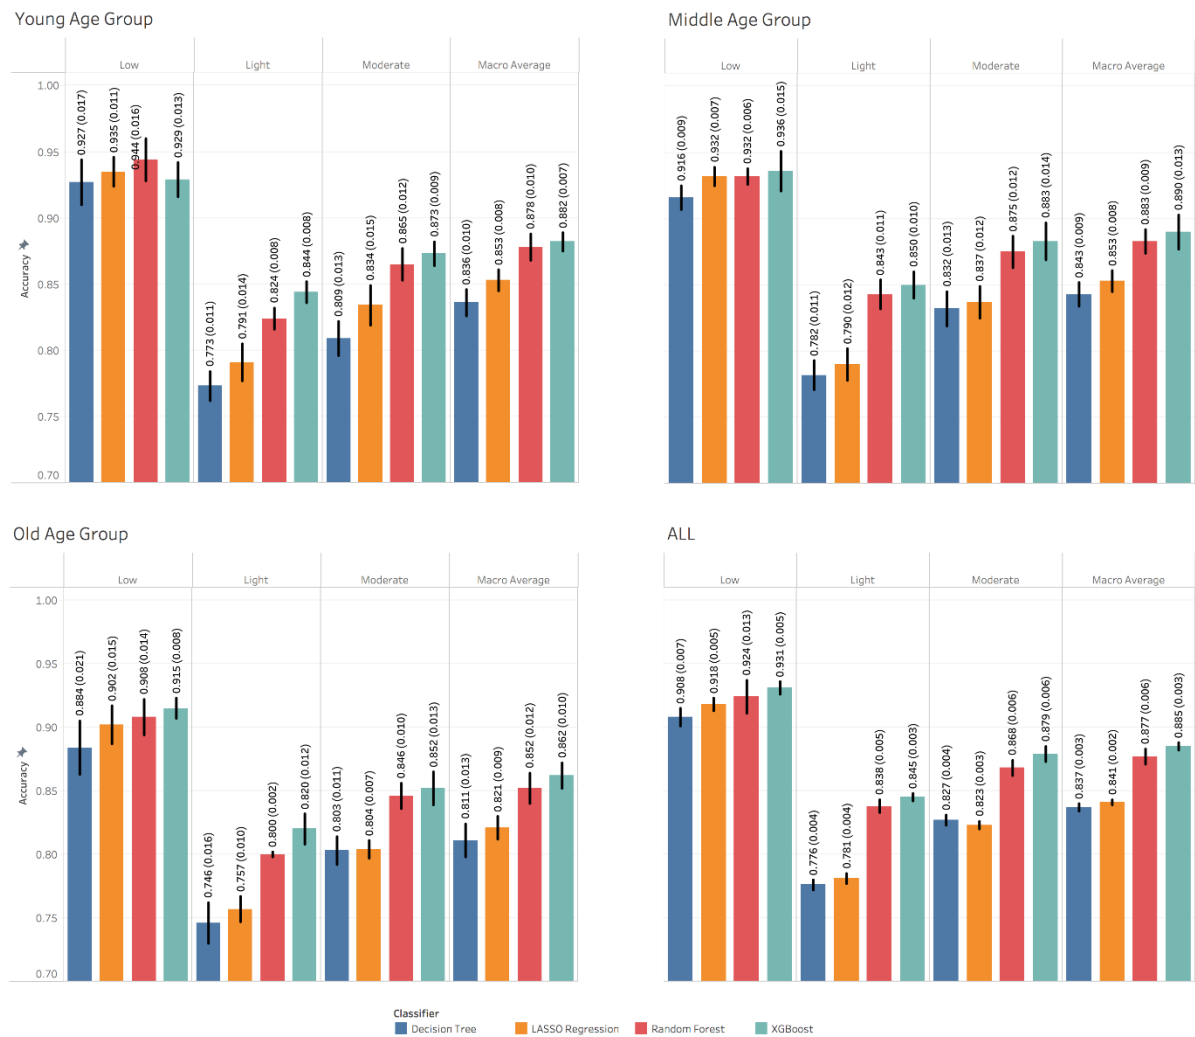

**Figure S6.** The accuracy of recognizing physical activity intensity. Each value is the mean and standard deviation of the 5-fold nested cross validation.

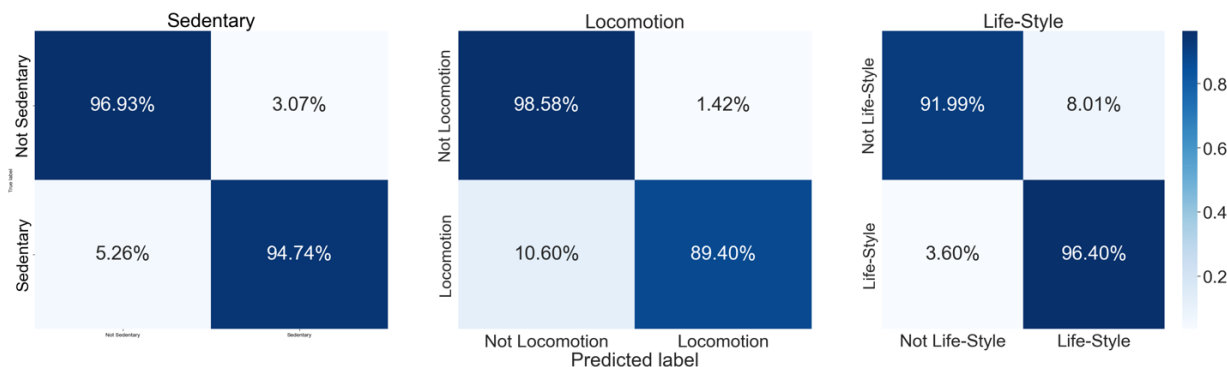

**Figure S7.** Confusion matrix of recognizing physical activity type for young age group.

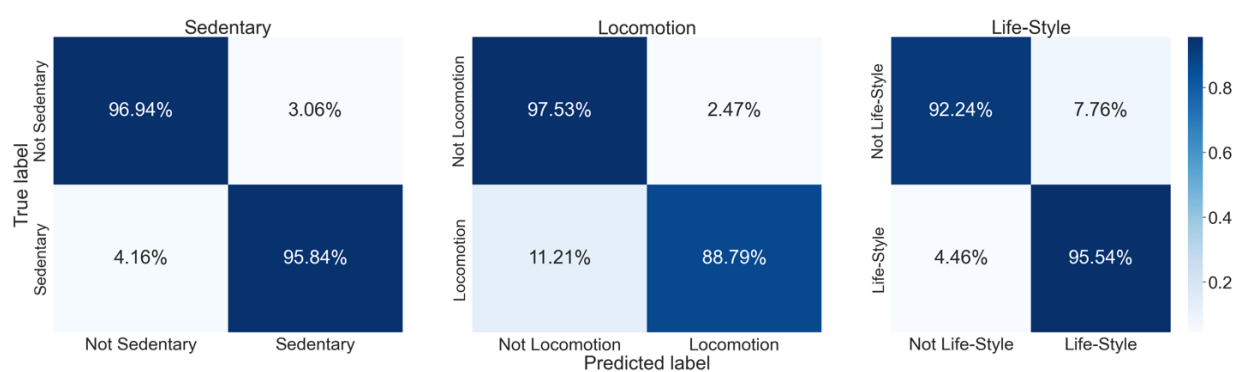

**Figure S8.** Confusion matrix of recognizing physical activity type for middle age group.

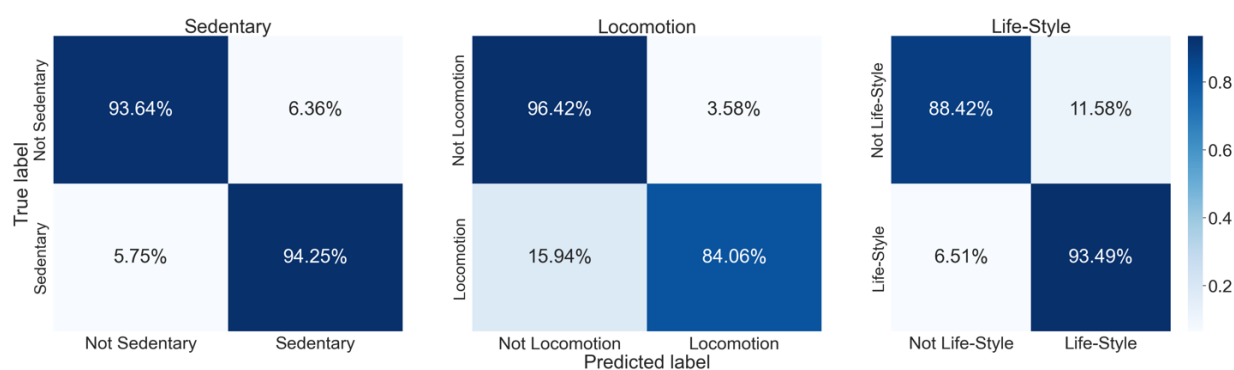

**Figure S9.** Confusion matrix of recognizing physical activity type for old age group.

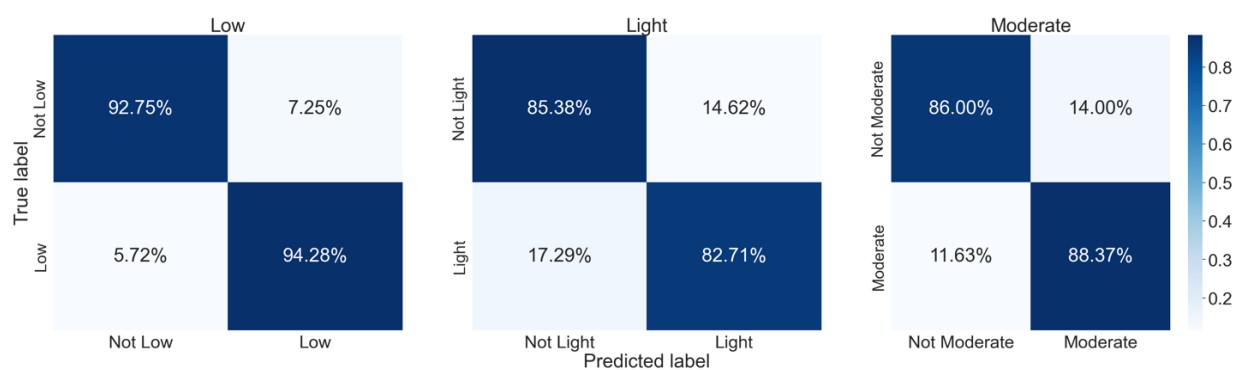

**Figure S10.** Confusion matrix of recognizing physical activity intensity for young age group.

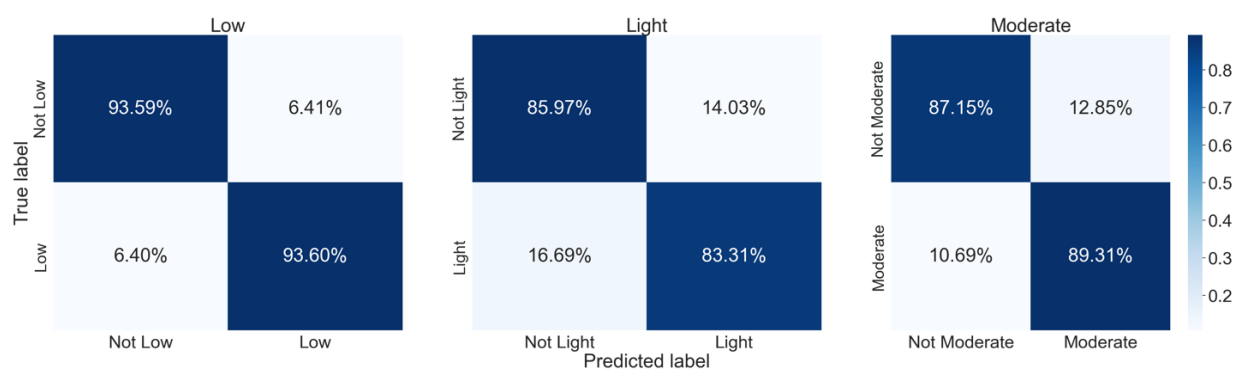

**Figure S11.** Confusion matrix of recognizing physical activity intensity for middle age group.



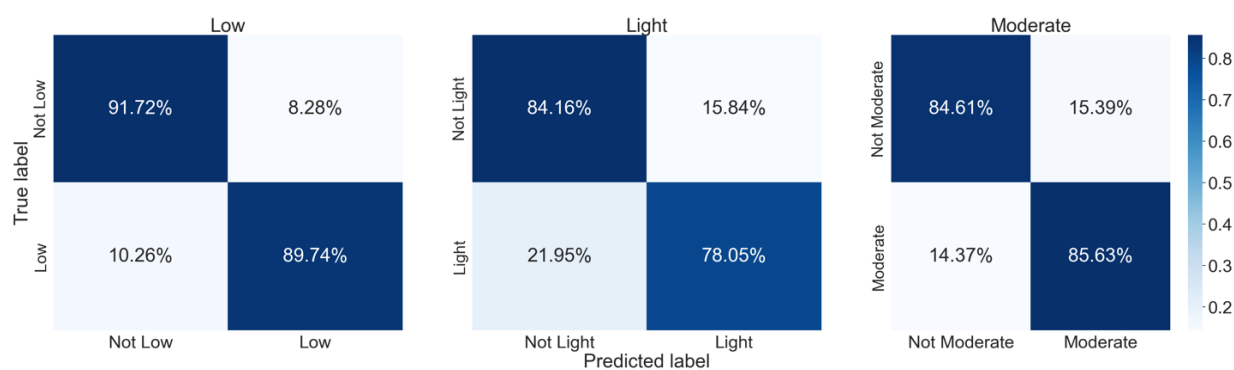

Figure S12. Confusion matrix of recognizing physical activity intensity for old age group.

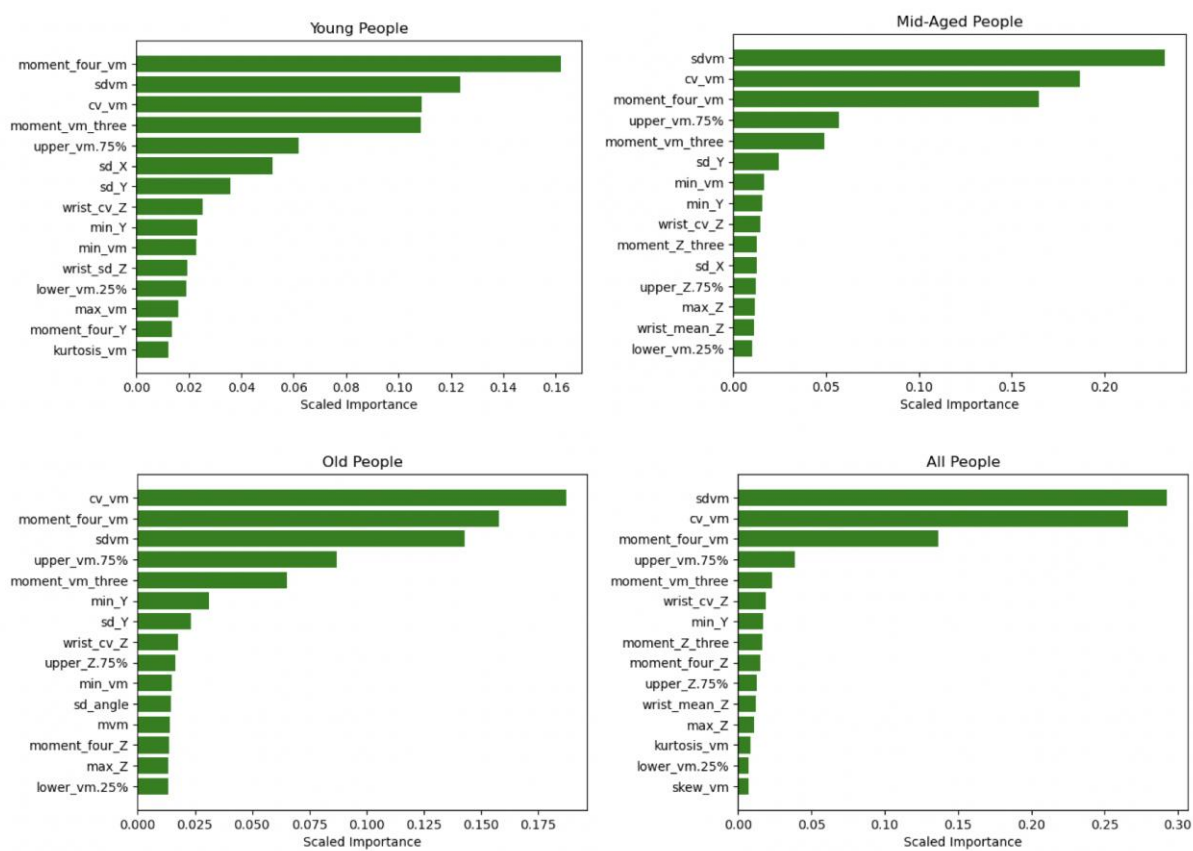

Figure S13. Feature importance for recognizing sedentary activities across age groups.

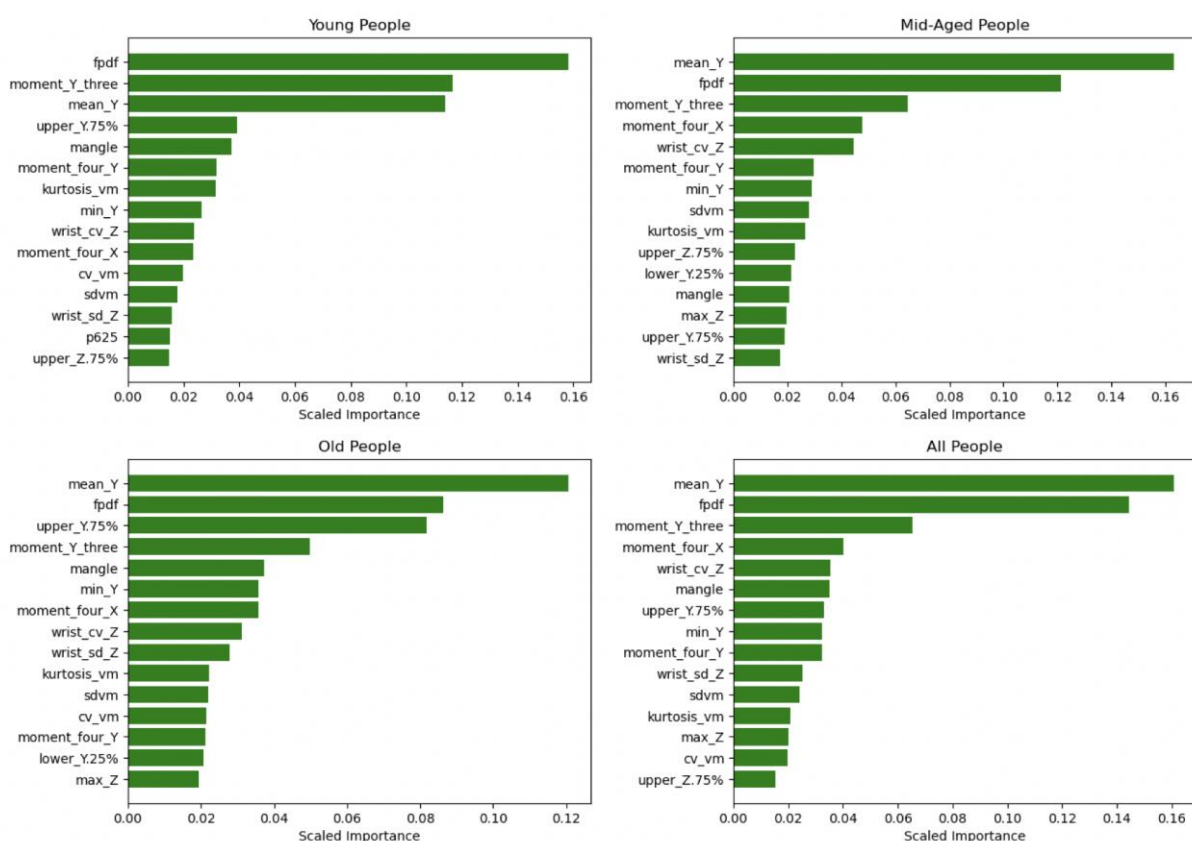

Figure S14. Feature importance for recognizing locomotion activities across age groups.

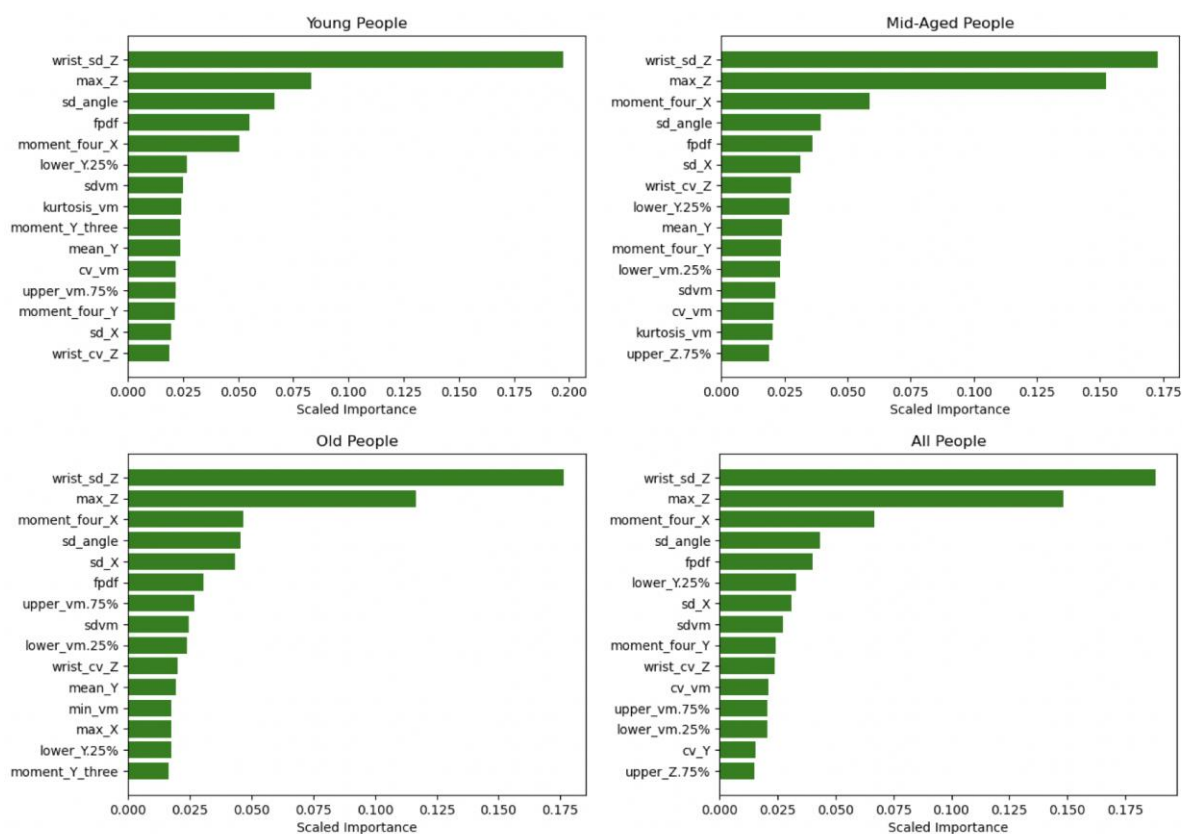

Figure S15. Feature importance for recognizing lifestyle activities across age groups.

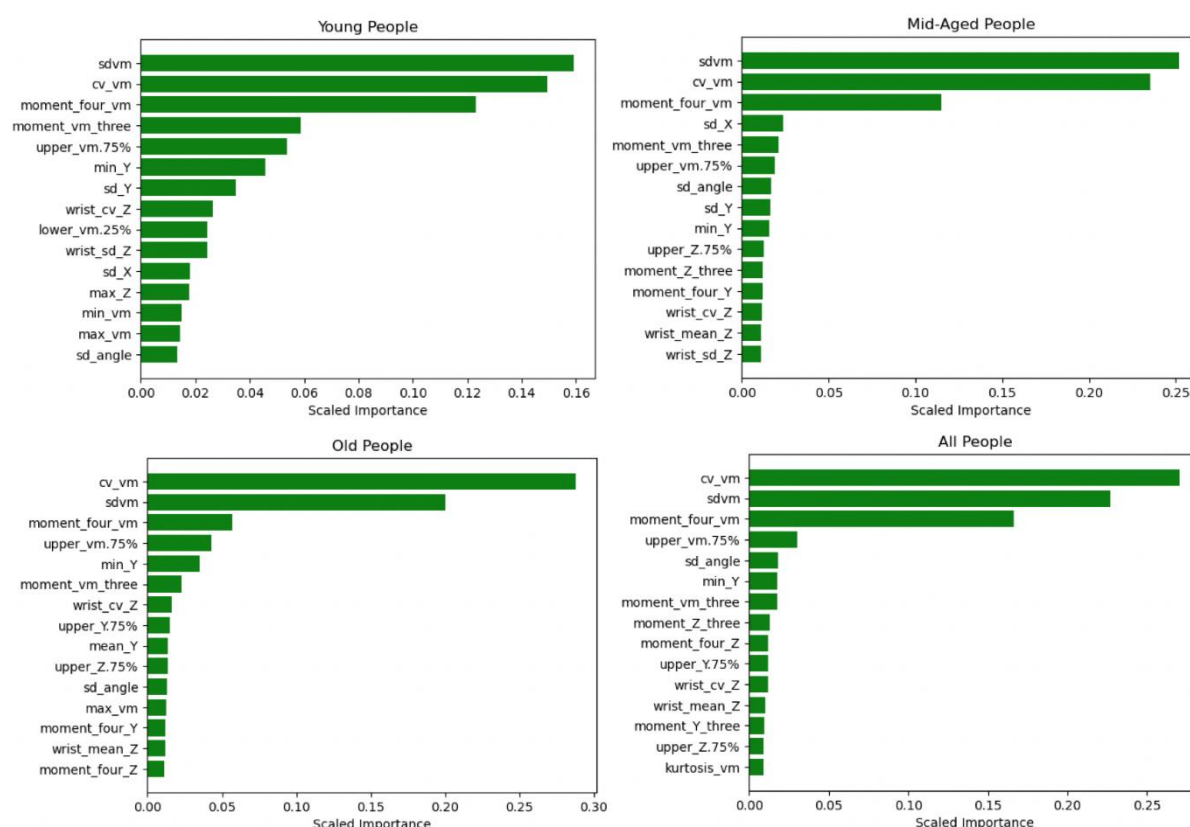

Figure S16. Feature importance for recognizing low intensity across age groups.

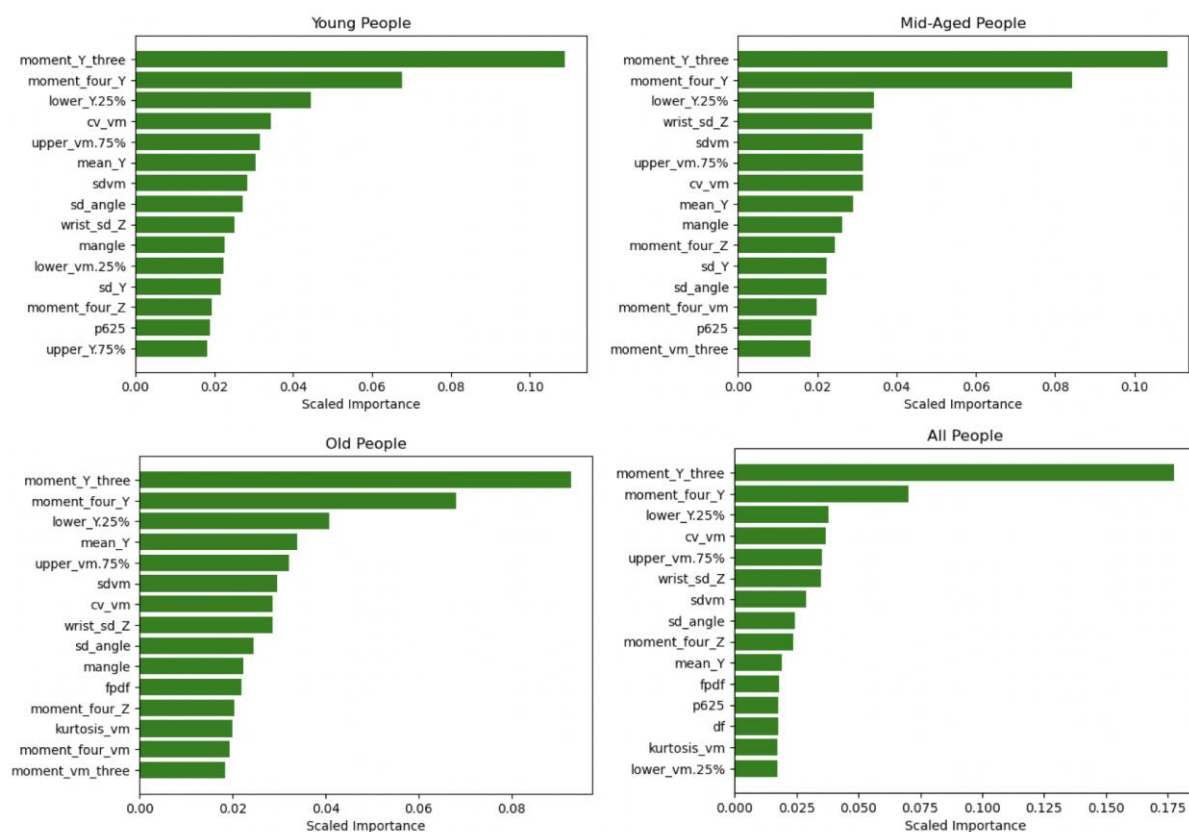

Figure S17. Feature importance for recognizing light intensity across age groups.

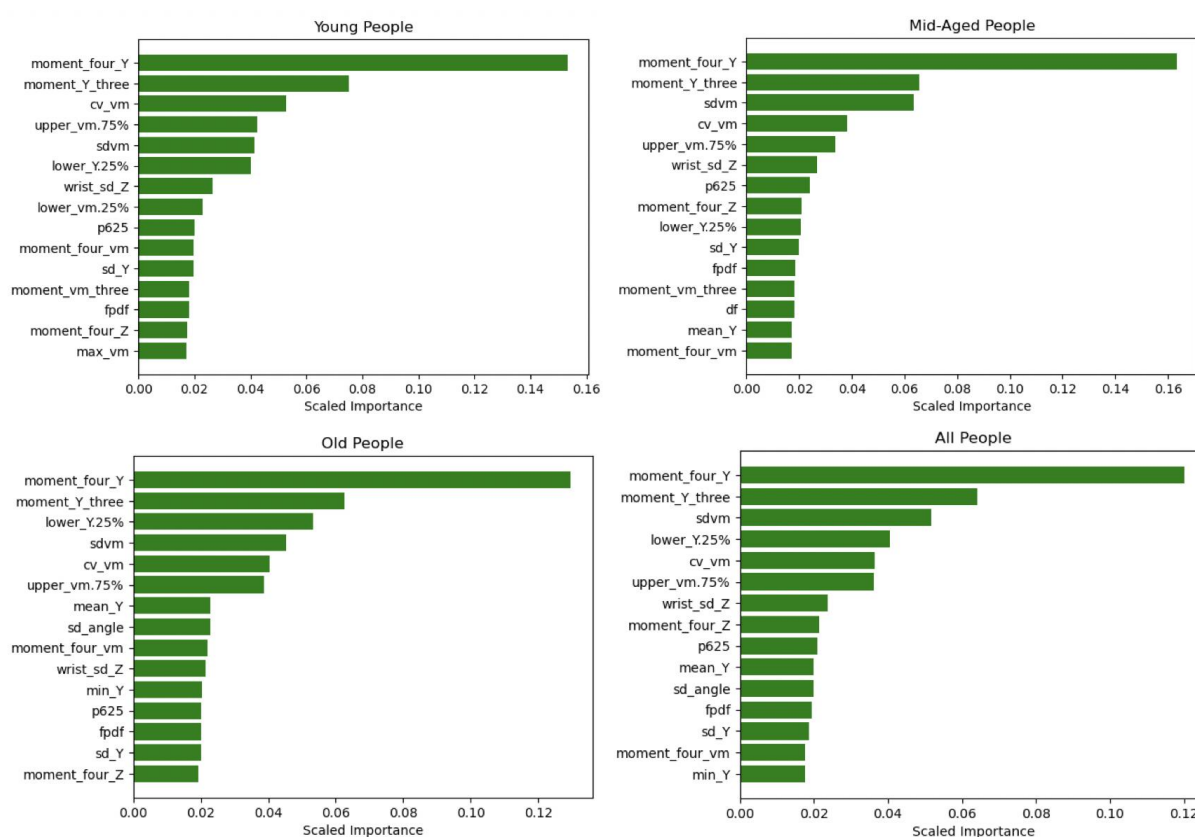

**Figure S18.** Feature importance for recognizing moderate intensity across age groups.

**Table S2.** Comparison with relevant work in the literature. The listed studies collected data from the wrist position for physical activity type classification. Classification performance is accuracy unless otherwise mentioned. For the purpose of comparison, we calculated the average accuracy for the physical activity type classification. N is the number of participants; Num is number; ML is machine learning; RMSE is the root mean square error; RF is random forest; SVM is support vector machine; and RLR is regularized logistic regression.

| Reference               | N   | Age         | Num. Activities | Num. Categories | ML Method | Classification Performance | RMSE          |
|-------------------------|-----|-------------|-----------------|-----------------|-----------|----------------------------|---------------|
| Our work                | 253 | 61.7 ± 17.7 | 33              | 3               | RF        | 95.4% ± 0.004              | 0.898 ± 0.048 |
| Mannini et al. [33]     | 33  | 18–75       | 26              | 4               | SVM       | 84.7%                      | NA            |
| Zhang et al. [56]       | 60  | 49.4 ± 6.5  | 10–12           | 4               | DT        | 97.0%                      | NA            |
| Ellis et al. [49]       | 40  | 35.8 ± 12.1 | 8               | 4 and 8         | RF        | 87.5% and 80.2%            | 1.00          |
| Trost et al. [57]       | 52  | 13.7 ± 3.1  | 12              | 7               | RLR       | 88.4%                      | NA            |
| Staudenmayer et al. [8] | 20  | 24.1 ± 4.5  | 19              | 2 and 3         | RF        | 96–99% and 76%             | 1.21          |
| Ahmadi et al. [19]      | 31  | 4.0 ± 0.9   | 5               | 5               | RF        | F1 = 80.6                  | NA            |
| Davoudi et al. [39]     | 40  | 55.2 ± 17.8 | 15              | 2               | Multiple  | 98–100%                    | 0.71          |

Studies that did not measure oxygen consumption were labeled as “not applicable” (NA).
